# Supplementary material for: Transcriptome profiling of genes involved in induced systemic salt tolerance conferred by Bacillus amyloliquefaciens FZB42 in Arabidopsis thaliana
Source: PubMed Central journal article supplement (PMC5597682; doi:10.1038/s41598-017-11308-8), 2017-09-13
Supplement: 41598_2017_11308_MOESM1_ESM.pdf [file 41598_2017_11308_MOESM1_ESM.pdf]

**Title**

**Transcriptome profiling of genes involved in induced systemic salt tolerance conferred by *Bacillus amyloliquefaciens* FZB42 in *Arabidopsis thaliana***

**Authors and e-mail address**

Shaofang Liu<sup>1,2</sup>, Haiting Hao<sup>1,2</sup>, Xiang Lu<sup>1,2</sup>, Xia Zhao<sup>1,2</sup>, Yun Wang<sup>3</sup>, Yubao Zhang<sup>1,2</sup>, Zhongkui Xie<sup>1,2</sup>, Ruoyu Wang<sup>1,2\*</sup>

\*Correspondence to: [wangruoyu@lzb.ac.cn](mailto:wangruoyu@lzb.ac.cn)

Shaofang Liu<sup>1,2</sup> liushaofanghnp@163.com

Haiting Hao<sup>1,2</sup> m18919046163@163.com

Xiang Lu<sup>1,2</sup> lux12@lzu.edu.cn

Xia Zhao<sup>1,2</sup> zhaoxia@lzb.ac.cn

Yun Wang<sup>3</sup> hp.wangyun@gmail.com

Yubao Zhang<sup>1,2</sup> zyubao@yahoo.com

Zhongkui Xie<sup>1,2</sup> wxhcas@lzb.ac.cn

Ruoyu Wang<sup>1,2\*</sup> wangruoyu@lzb.ac.cn

**Affiliations**

<sup>1</sup>Gaolan Station of Agricultural and Ecological Experiment, Northwest Institute of Eco-Environment and Resources, Chinese Academy of Sciences, Lanzhou, China.

<sup>2</sup>Key Laboratory of Stress Physiology and Ecology in Cold and Arid Regions of Gansu Province, Lanzhou, China.

<sup>3</sup>Key Laboratory of Desert and Desertification, Northwest Institute of Eco-Environment and Resources, Chinese Academy of Sciences, Lanzhou, Gansu 730000 China.

**Full address for correspondence**

\*Corresponding author: Ruoyu Wang, Gaolan Station of Agricultural and Ecological Experiment, Northwest Institute of Eco-Environment and Resources, Chinese Academy of Sciences, Lanzhou, China.

**Phone** +86-931-4967205

**E-mail address** wangruoyu@lzb.ac.cn

## Supplementary Information

This file contains 5 supplementary figures, three supplementary tables and captions of four supplementary tables that were uploaded as separate Excel documents.

### Figure legends

Fig. S1. Distribution of correlation co-efficiencies between each pair of samples.

Fig. S2. Distribution of reads in the reference genome. (C-1, C-2, and C-3) only water. (S-1, S-2, and S-3) only 100 mM NaCl. (B-1, B-2, and B-3) only FZB42 inoculation. (B+S-1, B+S-2, and B+S-3) 100 mM NaCl + FZB42 inoculation.

Fig. S3. Sequencing saturation analysis. (C-1, C-2, and C-3) only water. (S-1, S-2, and S-3) only 100 mM NaCl. (B-1, B-2, and B-3) only FZB42 inoculation. (B+S-1, B+S-2, and B+S-3) 100 mM NaCl + FZB42 inoculation.

Fig. S4. Pathway enrichment analysis of DEGs. The gene number of enrichment of DEGs under 0 (a) and 100 mM NaCl (b) conditions.

Fig. S5 SEM micrograph of FZB42 colonizing *Arabidopsis* roots growing under salt stress.

Figure S1

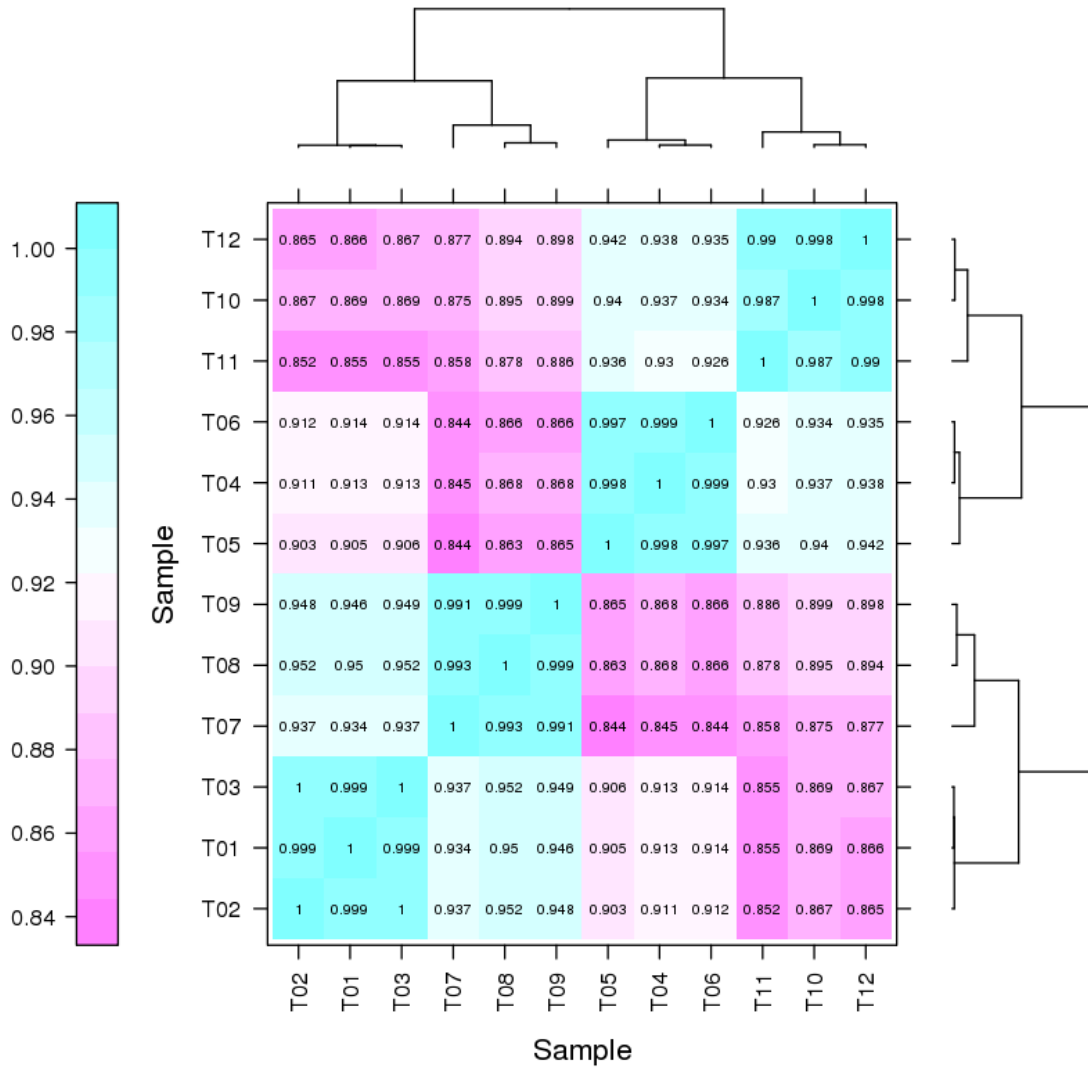

Figure S2

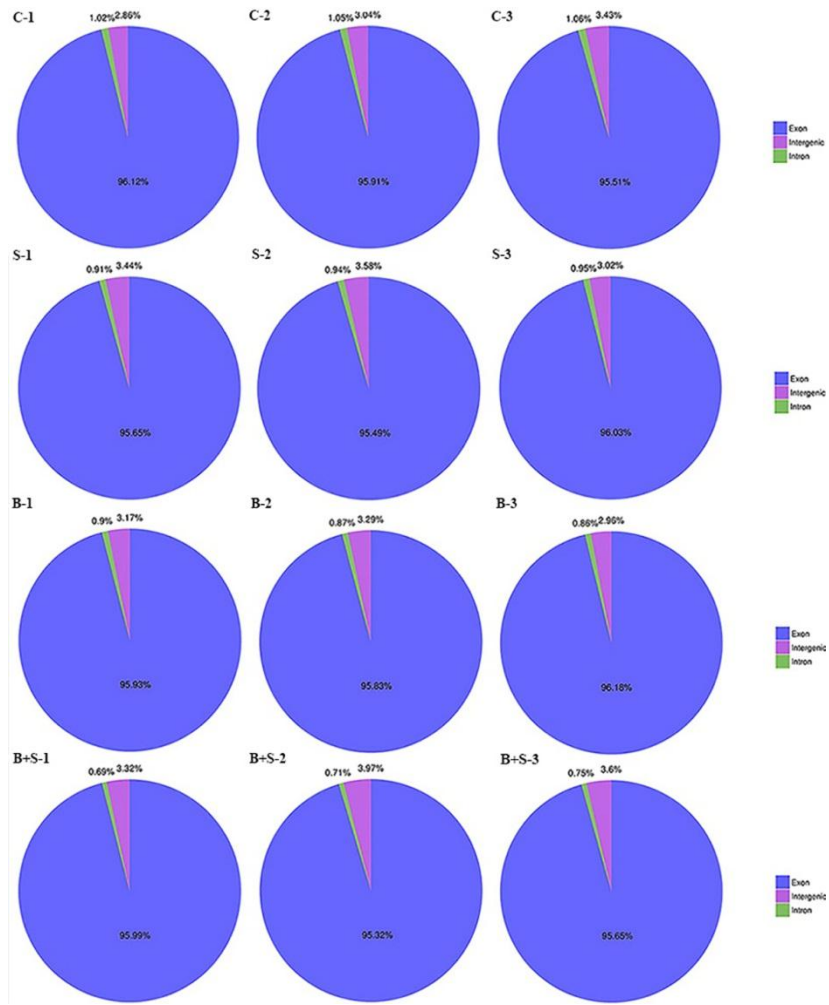

Figure S3

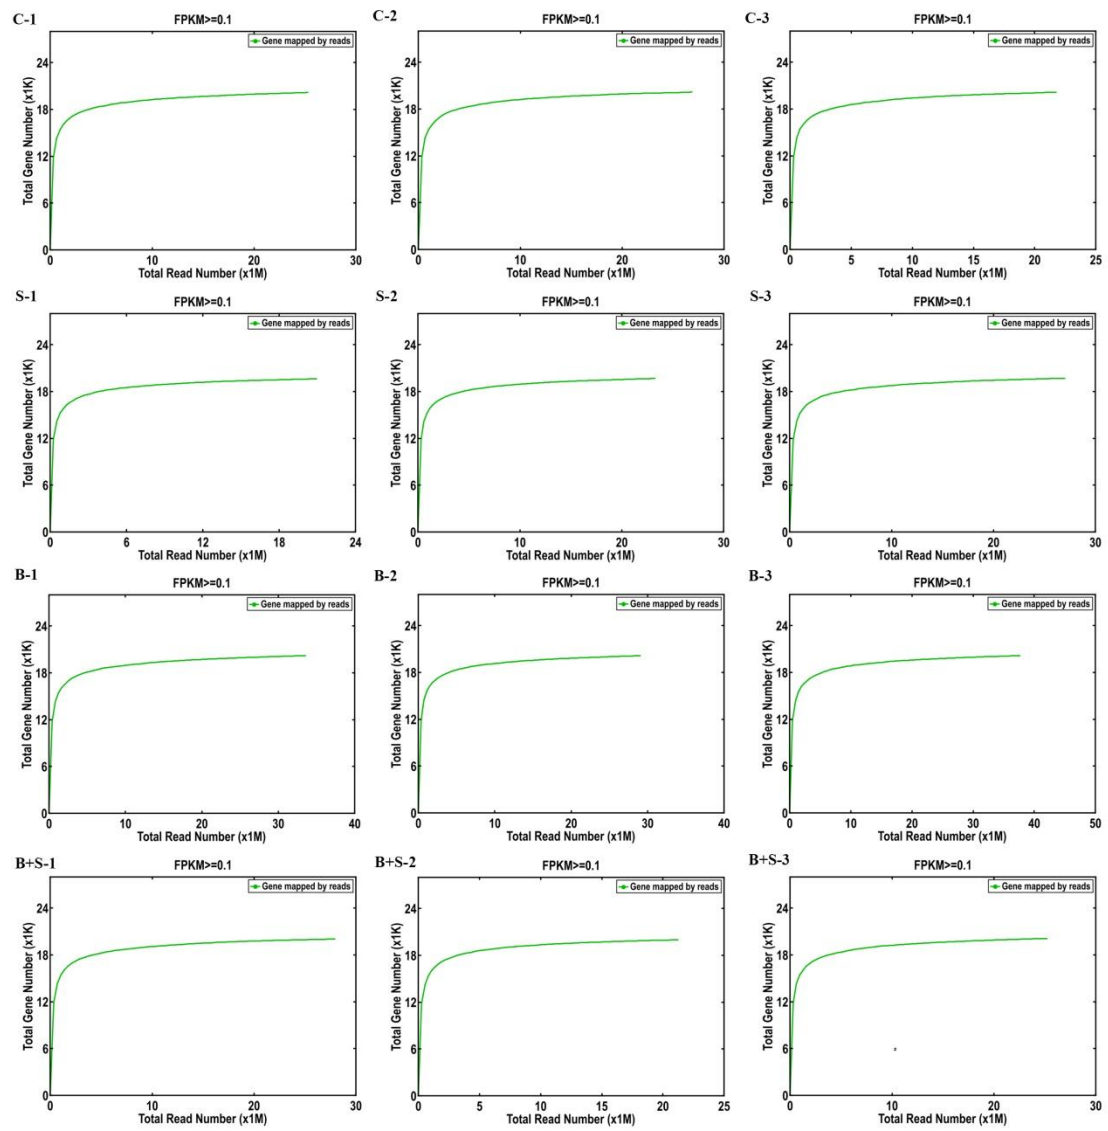

Figure S4

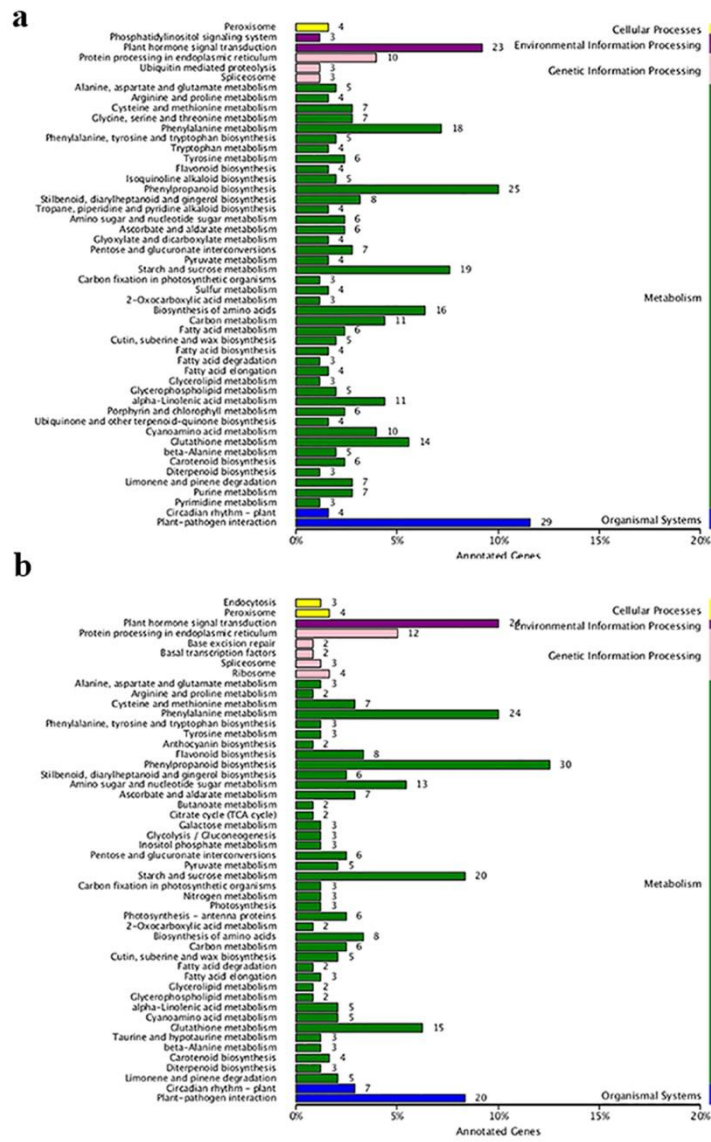

Figure S5

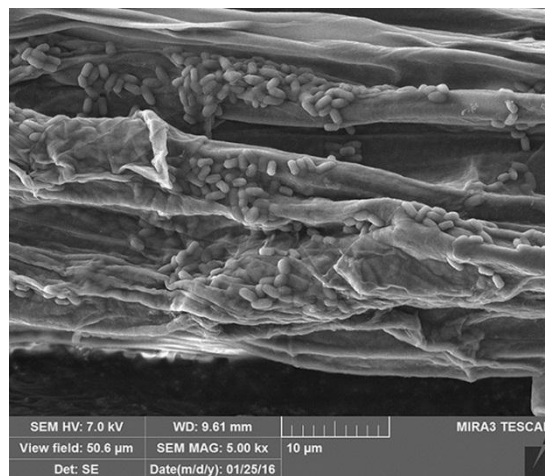

## Supplementary Tables

Supplementary Table S1 Reads sequenced under different experimental conditions. (C-1, C-2, and C-3) only water. (S-1, S-2, and S-3) only 100 mM NaCl. (B-1, B-2, and B-3) only FZB42 inoculation. (B+S-1, B+S-2, and B+S-3) 100 mM NaCl + FZB42 inoculation.

| <b>Samples</b> | <b>Raw reads<br/>(pair-end<br/>Reads)</b> | <b>Clean reads<br/>(pair-end<br/>Reads)</b> | <b>Total mapped<br/>reads</b> | <b>Uniq Mapped<br/>Reads</b> | <b>Multiple Map<br/>Reads</b> | <b>Reads Map to<br/>'+'</b> | <b>Reads Map<br/>to '-'</b> | <b>GC<br/>Content</b> | <b>%≥Q30</b> |
|----------------|-------------------------------------------|---------------------------------------------|-------------------------------|------------------------------|-------------------------------|-----------------------------|-----------------------------|-----------------------|--------------|
| C1             | 25,707,626                                | 25,287,096                                  | 42,447,477                    | 41,335,004                   | 1,112,473                     | 21,022,893                  | 21,020,847                  | 45.72%                | 89.36%       |
| C2             | 27,198,683                                | 26,814,983                                  | 44,812,496                    | 43,409,055                   | 1,403,441                     | 22,138,585                  | 22,134,569                  | 45.76%                | 89.08%       |
| C3             | 22,059,945                                | 21,734,952                                  | 36,355,044                    | 35,041,247                   | 1,313,797                     | 17,925,179                  | 17,922,841                  | 45.76%                | 88.88%       |
| S1             | 21,314,674                                | 20,918,631                                  | 35,077,565                    | 33,696,019                   | 1,381,546                     | 17,302,547                  | 17,294,776                  | 45.72%                | 89.15%       |
| S2             | 23,654,174                                | 23,225,094                                  | 39,141,609                    | 36,871,163                   | 2,270,446                     | 19,142,636                  | 19,136,244                  | 45.94%                | 89.56%       |
| S3             | 27,475,956                                | 27,006,276                                  | 45,644,056                    | 44,073,510                   | 1,570,546                     | 22,538,308                  | 22,535,804                  | 45.56%                | 89.41%       |
| B1             | 34,047,900                                | 33,542,161                                  | 57,164,061                    | 52,881,981                   | 4,282,080                     | 28,032,347                  | 28,021,499                  | 46.36%                | 89.98%       |
| B2             | 29,522,162                                | 29,033,542                                  | 48,892,132                    | 45,346,061                   | 3,546,071                     | 23,742,796                  | 23,738,531                  | 46.34%                | 89.46%       |
| B3             | 39,964,370                                | 37,652,903                                  | 63,683,484                    | 58,197,691                   | 5,485,793                     | 30,688,191                  | 30,665,743                  | 46.49%                | 89.95%       |
| B+S-1          | 28,988,104                                | 27,927,094                                  | 47,184,364                    | 43,282,466                   | 3,901,898                     | 22,901,473                  | 22,888,013                  | 46.50%                | 89.50%       |
| B+S-2          | 25,589,116                                | 21,218,761                                  | 35,203,720                    | 32,263,518                   | 2,940,202                     | 17,064,595                  | 17,051,535                  | 46.25%                | 88.98%       |
| B+S-3          | 26,561,635                                | 25,206,561                                  | 42,461,178                    | 38,930,904                   | 3,530,274                     | 20,581,178                  | 20,565,973                  | 46.32%                | 89.37%       |

Supplementary Table S3 Significantly enriched terms in FZB42-inoculated versus non-inoculated treatments at 0 and 100 mM NaCl (Corrected P-value < 0.05)

| 0 mM NaCl                         |         |                   |             |               |
|-----------------------------------|---------|-------------------|-------------|---------------|
| #Kegg_pathway                     | ko_ID   | Corrected_P-value | upregulated | downregulated |
| Plant-pathogen interaction        | ko04626 | 8.41E-07          | 23          | 6             |
| Phenylpropanoid biosynthesis      | ko00940 | 4.78E-05          | 17          | 8             |
| alpha-Linolenic acid metabolism   | ko00592 | 5.12E-05          | 7           | 4             |
| Phenylalanine metabolism          | ko00360 | 0.002487989       | 12          | 6             |
| Glutathione metabolism            | ko00480 | 0.033103794       | 6           | 8             |
| 100 mM NaCl                       |         |                   |             |               |
| #Kegg_pathway                     | ko_ID   | Corrected_P-value | upregulated | downregulated |
| Plant-pathogen interaction        | ko04626 | 0.023232437       | 30          | 0             |
| Phenylpropanoid biosynthesis      | ko00940 | 1.02E-08          | 23          | 1             |
| Phenylalanine metabolism          | ko00360 | 1.23E-07          | 8           | 0             |
| Flavonoid biosynthesis            | ko00941 | 0.000392944       | 11          | 4             |
| Glutathione metabolism            | ko00480 | 0.00495341        | 19          | 1             |
| Photosynthesis - antenna proteins | ko00196 | 0.041948538       | 6           | 0             |

Supplementary Table S7 RT-PCR primer sequences used in this study.

| Gene_ID   | Gene putative function                                  | Primer(Forward 5'-3')     | Primer(Reverse 5'-3')    |
|-----------|---------------------------------------------------------|---------------------------|--------------------------|
| AT5G44420 | ethylene- and jasmonate-responsive plant defensin       | CAGAAGTTGTGCGAGAAGCC      | GTGCTGGGAAGACATAGTTGC    |
| AT3G23250 | myb domain protein 15                                   | CGGAGCTAGCAGATTCATCA      | CGTCGTGGCTTATGAGTGTC     |
| AT4G26200 | 1-aminocyclopropane-1-carboxylate synthase 7            | AGACACTCACGGCGAAGACT      | ACCTGATTCTCAGCGAGACC     |
| AT1G17420 | lipoxygenase 3                                          | TGTGCTTACACCTCCAGTCG      | GCATGTGTCCGTAACCAGTG     |
| AT4G39210 | glucose-1-phosphate adenylyltransferase large subunit 3 | CCGGTGTGCTTACGCTATT       | CCATCGCCTCCTCCTAGAAT     |
| AT4G23700 | cation/H(+) antiporter 17                               | CCGGTGTGCTTACGCTATT       | CCATCGCCTCCTCCTAGAAT     |
| AT1G29910 | chlorophyll A/B binding protein 3                       | AGCGATGGAGGACTCGATTA      | CCTGCGACTCTGTAGCCTTC     |
| AT2G05070 | photosystem II light harvesting complex protein 2.2     | CTCTCTGCTTTGTAAACTCGTGA   | CCCAAGAAACATCATTAAAGTGCC |
| ATCG00120 | ATP synthase CF1 alpha subunit                          | TCTTCCGTGGCTCAGGTAGT      | CCTGTATAAGGCGCGAGGTA     |
| ATCG00580 | photosystem II protein V                                | TGTCTGGAAGCACAGGAGAA      | AACCGGTGCTGACGAATAAC     |
| AT2G39800 | delta1-pyrroline-5-carboxylate synthase 1               | GCTCGCTTAGTTATGACACCTG    | ACCATCTGCCACCTCTGTTT     |
| AT2G05100 | photosystem II light harvesting complex protein 2.1     | CTCTGCTTTGTAAAGTCGTGAATGT | TGCCAAAACAAACTCACCTGC    |
| AT2G34420 | photosystem II light harvesting complex protein B1B2    | GCGACGGAGGATTGGACTAC      | ATCTCCGGCGACTCTGTAGC     |
| AT3G27690 | photosystem II light harvesting complex protein 2.3     | GCCACTTCAGCAATCCAACA      | TTGACGGTACGACGCATGAT     |
| AT5G54270 | light-harvesting chlorophyll B-binding protein 3        | TGGCTTCCAAGTCATCCTCA      | AACTGGATCATCAGCGAGACC    |
| AT4G39770 | probable trehalose-phosphate phosphatase H              | GCCAACCAGCTACAGAGTTCC     | GCGTCGGAAGTGAACAGAGA     |
| AT1G64170 | cation/H(+) antiporter 16                               | TCTCGGCGACAACAATTCTC      | CGGATGTTTCAGCCATTCGTA    |
| AT1G14540 | peroxidase 4                                            | TCCGATCTTCAATCCGAACC      | AGTTGCCACGAGCATGACC      |
| AT1G70290 | putative alpha,alpha-trehalose-phosphate synthase       | AGCGCGGTCACATAGGTCTT      | TCTTCGCCGAGTAGAATCA      |
| AT3G14440 | 9-cis-epoxycarotenoid dioxygenase NCED3                 | CACGACGAGAAGACATGGAA      | TCCGATGAATGTACCGTGAA     |
| AT4G13250 | probable chlorophyll(ide) b reductase NYC1              | CACAACCGAACCAATCACAC      | GTGGATCGATGAACGTGTTG     |
| AT1G78090 | trehalose-6-phosphate phosphatase                       | CACTTCCTGGCTAAGGAGAGG     | CATCTCCATCGCTCTGTTA      |
| AT4G36110 | SAUR-like auxin-responsive protein                      | GCGTTGTCTCAAGCAGCATC      | CTTCGGTGTGACCGACGTA      |



|           |                                                  |                        |                        |
|-----------|--------------------------------------------------|------------------------|------------------------|
| AT5G23370 | putative GEM-like protein 8                      | TCTTCAAGGCGTACCAATGC   | AGGAGAAGCCACCTTGATCG   |
| AT3G24500 | multiprotein-bridging factor 1c                  | GGTTCCGGTGATTAACACGA   | CGCTTGTGACATCTTCTTCTCC |
| AT3G03480 | acetyl CoA:(Z)-3-hexen-1-ol acetyltransferase    | TGAGCTGGAAGAGGCTGATG   | TGACCTGGACGAGAAGCAGA   |
| AT4G08390 | L-ascorbate peroxidase S                         | CACCAGGAGGACAGTCATGG   | TCGAAGATGGCAGCATCAGT   |
| AT1G05560 | UDP-glucosyltransferase 75B1                     | GAACGCGAAGCTACTGGAAGA  | CCACCGACTTCTCCTCCATC   |
| AT5G51720 | CDGSH iron-sulfur domain-containing protein NEET | GCTATCATCGCAAGCACGTT   | TGCTCTCACCACCACCATTC   |
| AT4G32810 | carotenoid cleavage dioxygenase 8                | TGGAACATTGGAGACCACGA   | AAGCGTCGGATTCAAGGAGA   |
| AT3G12580 | heat shock protein 70-4                          | TCAGCGTCAAGCGACTAAGG   | CAACACTCGACGCCTTCTTG   |
| AT3G04800 | translocase inner membrane subunit 23-3          | GAACTCCGGTGGACTCGTTG   | TGTCAACGAACCGTCGTCTC   |
| AT1G64900 | cytochrome P450 89A2                             | GTCGCCAACATGGTCAGAGA   | GCAAGAGCCTTAAGCGGATG   |
| AT3G44990 | xyloglucan endotransglucosylase/hydrolase        | CACCAACGTAGAGAGCAAGACG | GCCTGGTTGGAGCTTAATGG   |
| AT1G10070 | branched-chain-amino-acid aminotransferase 2     | TGGACAGGCGATATACGAAGG  | AACCGAAGGAGAAGGCATGA   |
| AT3G18780 | ACT2                                             | AGCAGAGCGGGAAATTGTAA   | TTCTCGATGGAAGAGCTGGT   |
| AT2G44065 | ribosomal protein L2 family protein              | GGGACACCAAGTGGATCAAT   | TGGGCCTTATCCCTAACCA    |

Supplementary Table S2 Specific and common DEGs in FZB42-inoculated versus non-inoculated plants at 0 and 100 mM NaCl.

Supplementary Table S4 DEGs involved in different metabolic processes at 0 and 100 mM NaCl, respectively, by MapMan analysis.

Supplementary Table S5 Overview of cell functions related to DEGs in FZB42-inoculated versus non-inoculated plants at 0 and 100 mM NaCl, respectively, according to Mapman.

Supplementary Table S6 DEGs of FZB42 inoculated versus FZB42 non-inoculated treatments under non-stress and stress conditions mentioned in results.
